# Supplementary material for: PPARG in Human Adipogenesis: Differential Contribution of Canonical Transcripts and Dominant Negative Isoforms
Source: PubMed Central journal article supplement (PMC3981527; doi:10.1155/2014/537865), 2014-03-23
Supplement: 537865.f1.pdf [file 537865.f1.pdf]

### Supplementary File 1.

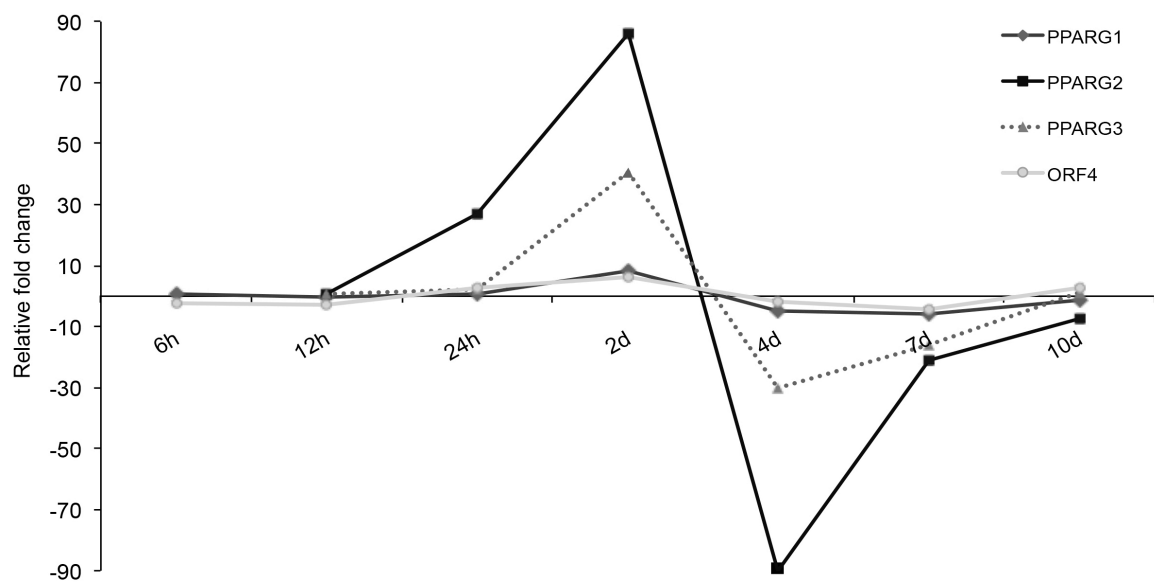

### Figure legend Supplementary File 1.

Pairwise comparison of fold change variations for PPARG transcripts between two subsequent time points in hMSCs' differentiation into adipocytes.
